# Supplementary material for: UV-Responsive, wide color gamut, inkless dynamic photonic paper enabled by disulfide-containing polyurethane based Fabry-Perot resonant cavity
Source: Royal Society of Chemistry journal article supplement (doi:10.1039/d2tc01979e), 2022-01-01
Supplement: d2tc01979e1.pdf [file d2tc01979e1.pdf]

# UV-responsive, wide color gamut, inkless dynamic photonic paper enabled by disulfide-containing polyurethane based Fabry-Perot resonant cavity

Chenhong Liang,‡ Fuqiang Fan,‡ Kewei Li, Chao Liu, Guangrong Wang, Liying Zhang, Xuemin Zhang, Yu Fu\* and Tieqiang Wang\*

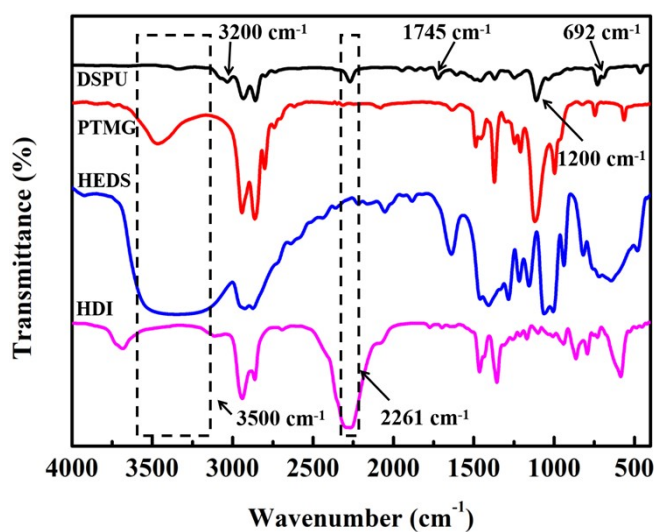

Fig. S1 The FTIR spectra of disulfide-containing polyurethane (DSPU), PTMG, HEDS and HDI.

---

Department of Chemistry, College of Sciences, Northeastern University, Shenyang 110819, P. R. China

Email: fuyu@mail.neu.edu.cn, wangtieqiang@mail.neu.edu.cn

†Electronic supplementary information (ESI) available: [The FTIR spectra of disulfide-containing polyurethane (DSPU), PTMG, HEDS and HDI are available in the Fig. S1. The normalized transmittance spectra and the corresponding color changes of Fabry-Perot resonant cavity with different thicknesses of DSPU layer are available in Fig. S2.]

‡ These authors contributed equally to this work.

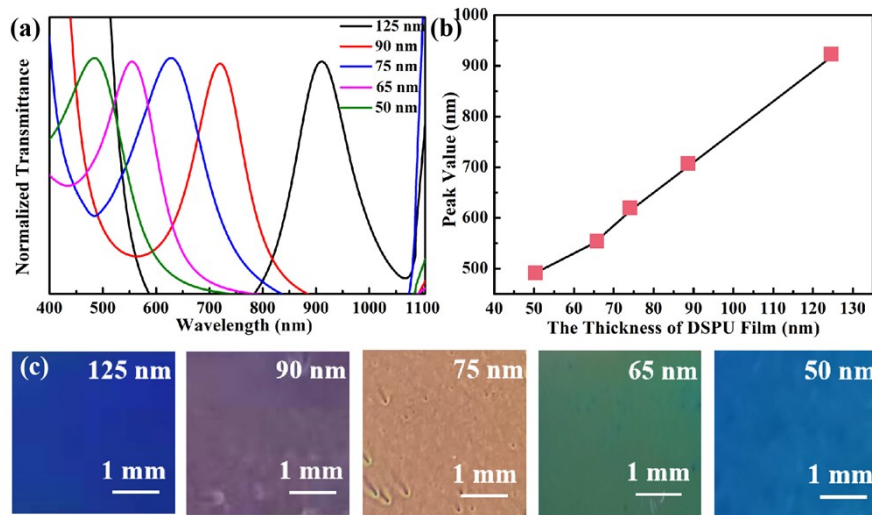

**Fig. S2** (a) The normalized transmittance spectra of Fabry-Perot resonant cavity with different thicknesses of DSPU layers. (b) The relation curve between the wavelength of the transmission peaks and the thicknesses of DSPU layer. (c) The corresponding color changes of Fabry-Perot resonant cavity with different thicknesses of DSPU layer.
